# Supplementary material for: Synergistic effect of sildenafil combined with controlled hypothermia to alleviate microglial activation after neonatal hypoxia–ischemia in rats
Source: Springer Nature journal article supplement (doi:10.1186/s12974-024-03022-w), 2024-01-23
Supplement: MOESM1 [file 26654482]

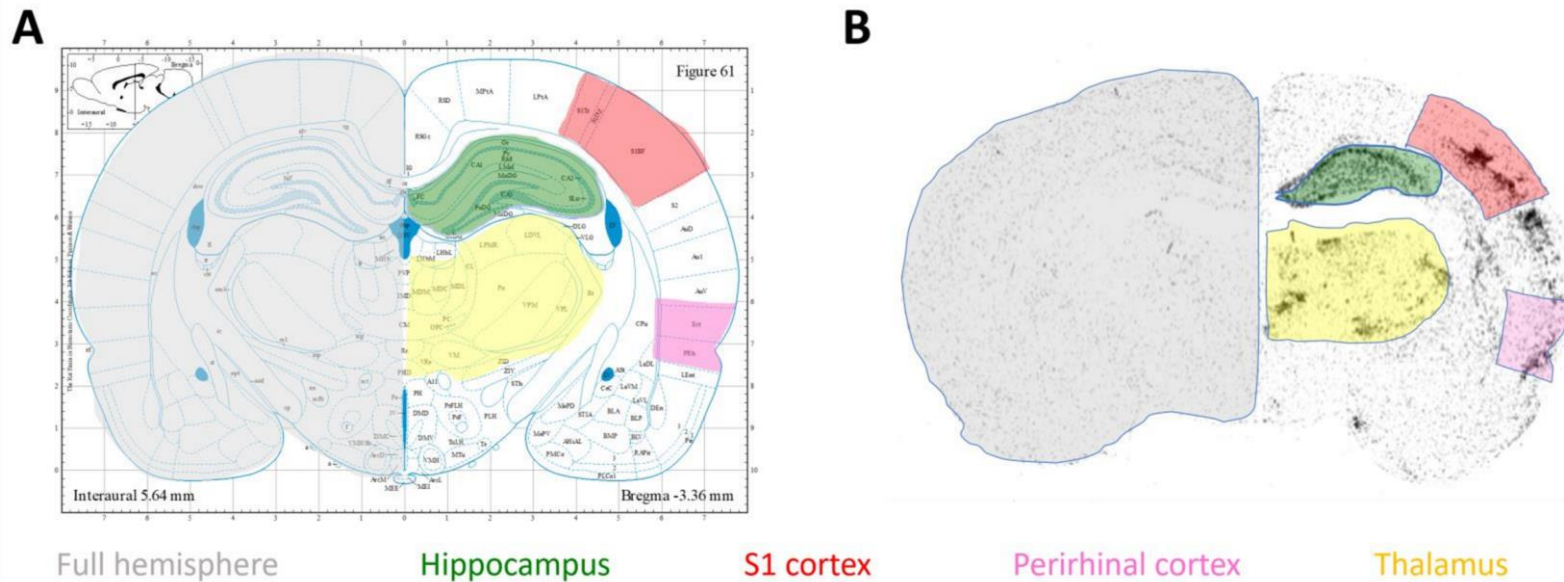

**Figure S1: Segmentation of the brain slices according to Paxinos and Watson Atlas (1998)\* used for immunohistochemistry.** Quantifications were performed on a section nearby the maximal lesion size around Bregman -3.36mm.

\* Paxinos G and Watson C. 1998. The rat brain in stereotaxic coordinates, 4th ed. San Diego, CA, USA; Academic press.

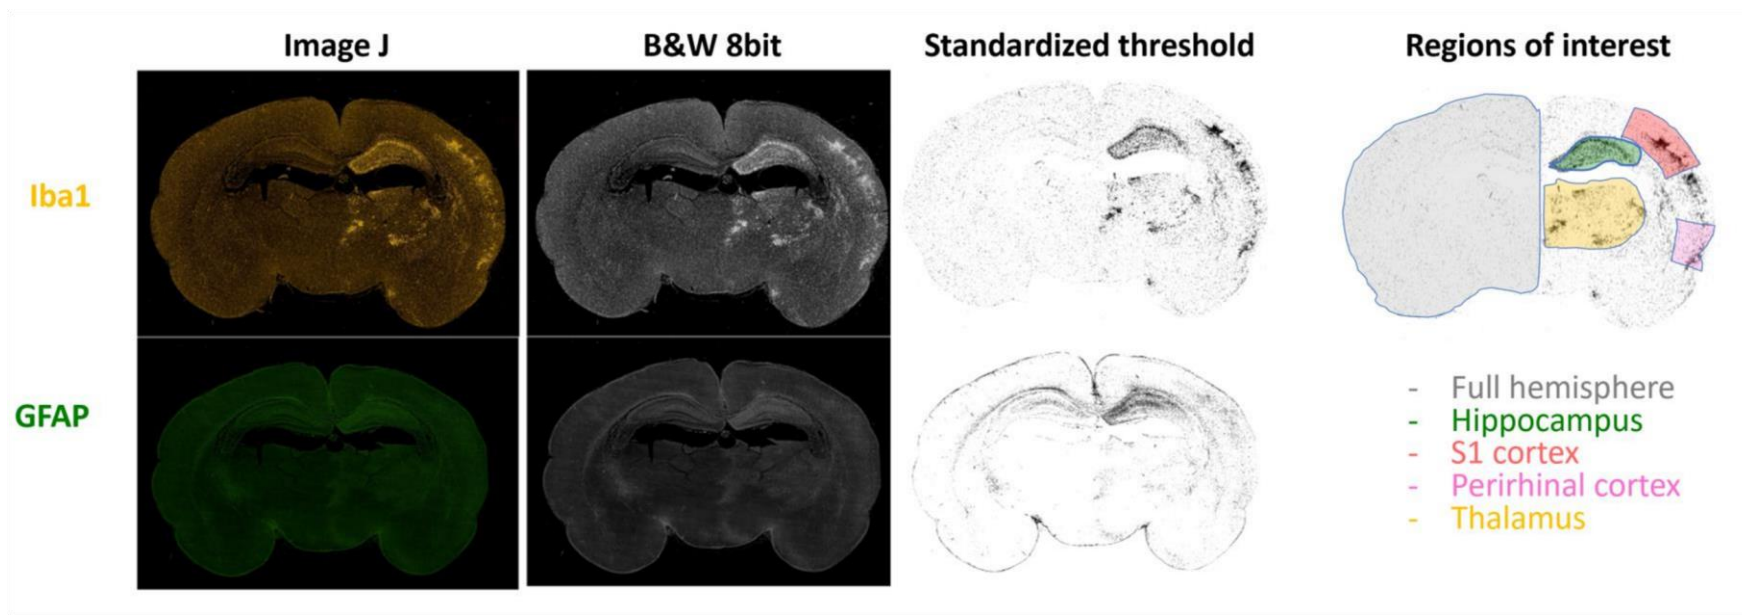

**Figure S2: Quantification of cell-specific staining within segmented brain area, from a standardized threshold.** Imaging processing for assessing immunostaining using the Fiji software in total hemisphere and four delimited brain regions: hippocampus, S1 cortex, perirhinal cortex and thalamus.

Quantifications were performed after images were converted into black and white 8-bit signal and according to a predefined standardized threshold.

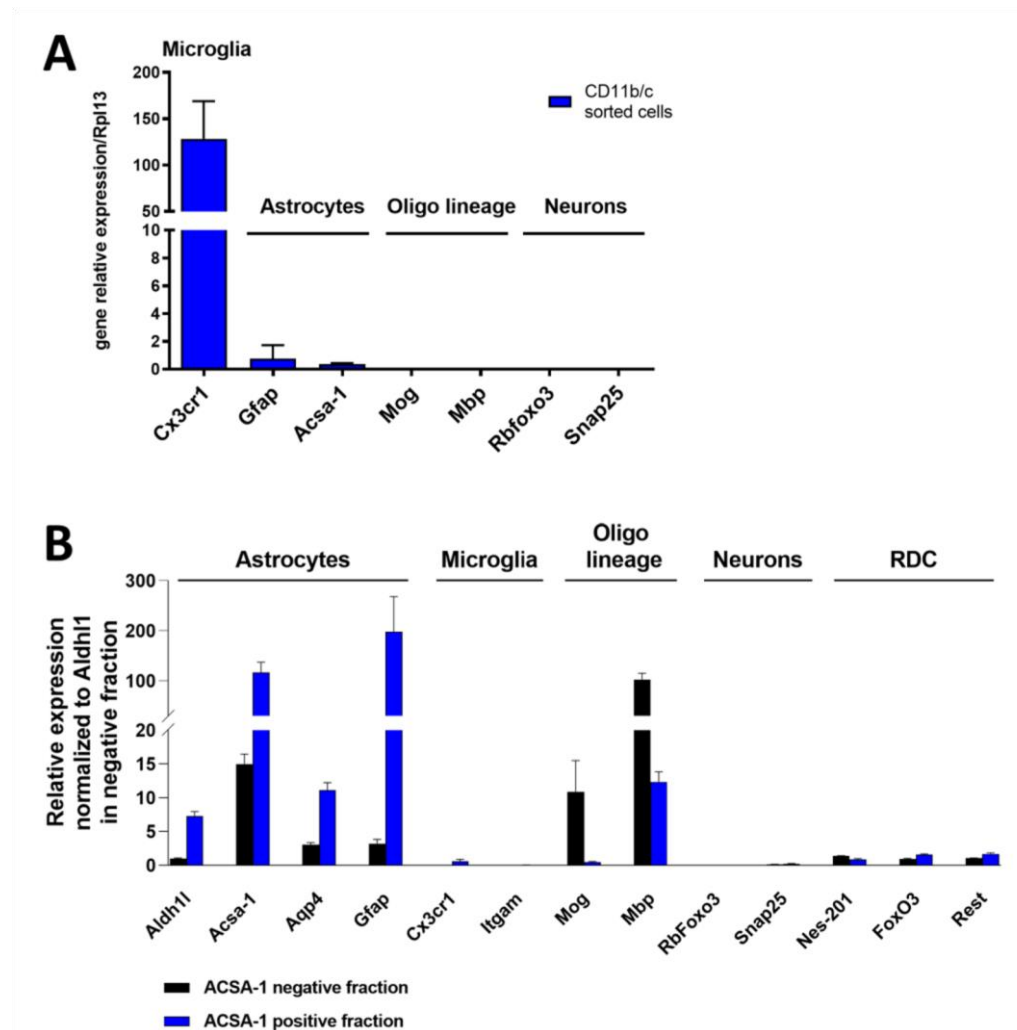

**Figure S3: Assessment of cell purity after magnetic antibody-based cell sorting.** **A:** CD11b/c positive cells showed a large majority of Cx3CR1-positive cells and less than 1% astrocytic contamination. **B:** ACSA-1 positive cells showed a large proportion of GFAP positive astrocytes and less than 5% contamination from oligodendroglial lineage. RDC means recurrent DNA double-strand break clusters observed in neural stem/progenitor cells.

|     | SHAM      | HI            | HI+HT        | HI+SILD      | HI+SILD+HT    |
|-----|-----------|---------------|--------------|--------------|---------------|
| P11 | 2.66±0.17 | 0.68±0.17**** | 0.73±0.31*** | 0.67±0.21*** | 0.19±0.29**** |
| P12 | 4.56±0.24 | 2.45±0.20**** | 2.49±0.37*** | 2.55±0.24*** | 1.53±0.34**** |
| P13 | 5.67±0.36 | 3.63±0.21**** | 3.76±0.40*** | 4.04±0.26*** | 3.00±0.33**** |

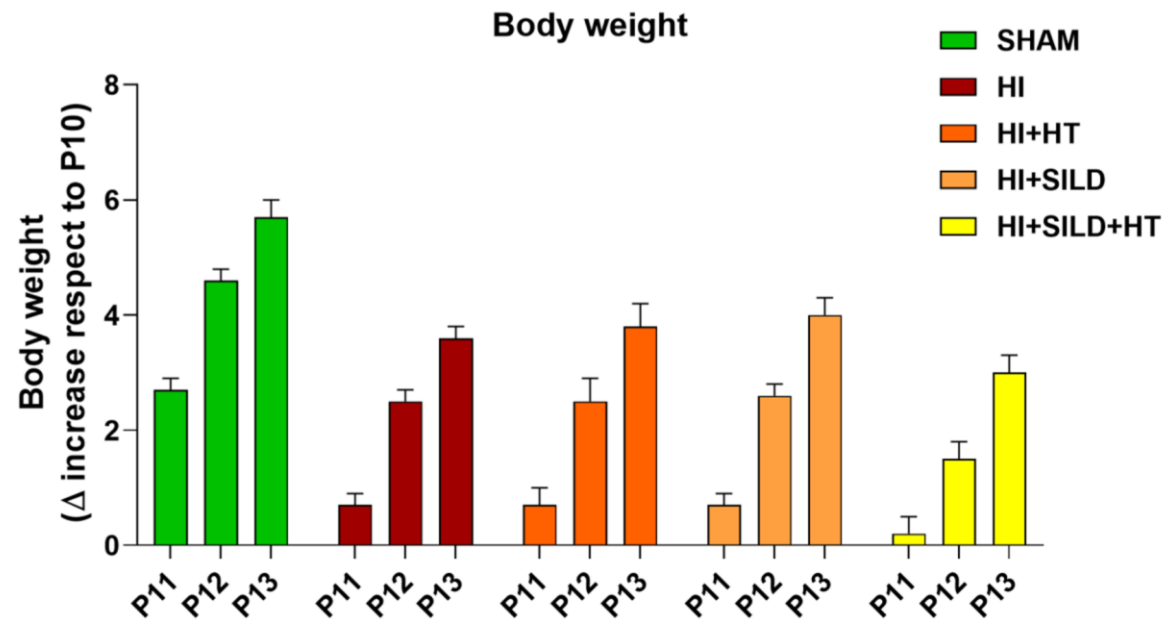

Figure S4: Body weight gain between P10 and P13 rats subjected to HI at P11 and kept either on normothermia (HI, n=78) compared to sham (n=26), or treated by hypothermia alone (HT, n=41), Sildenafil ip alone (Sild, n=48), and the combined treatment (Sild+HT, n=46). Body weight changes for each day compared to P10 are expressed in mean ± SEM. Weight gain in Sham group (controls) was compared in each experimental groups using one-way ANOVA with Dunnet's multiple comparisons test (\*\*\*: p<0.001; \*\*\*\*: p<0.0001).

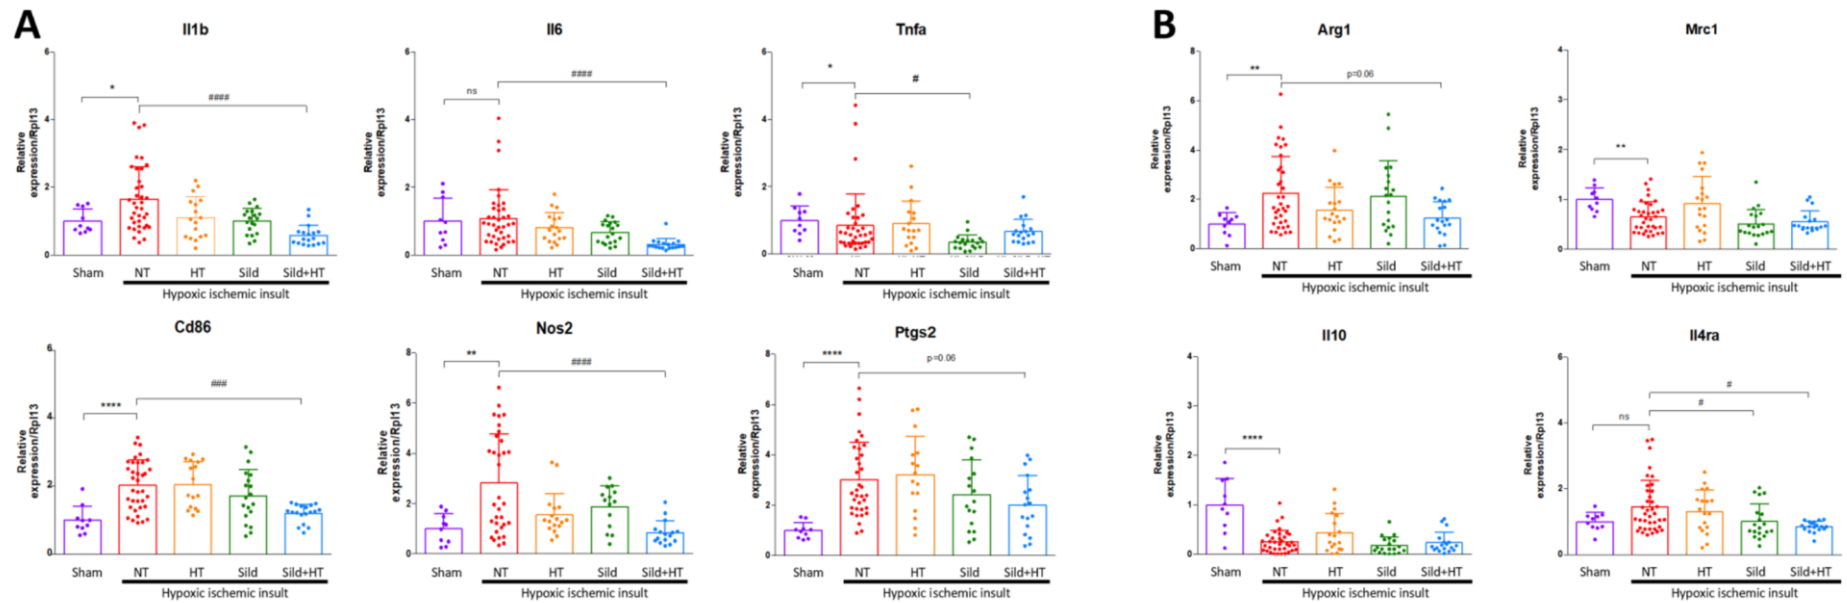

**Figure S5: Gene expression polarization in Iba1-positive MG/M $\phi$  cells sorted from the ipsilateral hemisphere of P13 rats subjected to HI at P11 and kept either on normothermia (HI, n=41) compared to sham (n=12), or treated by hypothermia alone (HT, n=19), Sildenafil ip alone (Sild, n=20), and the combined treatment (Sild+HT, n=18).** Detailed gene expression of several pro-inflammatory (A) and immunoregulatory/anti-inflammatory markers (B). Quantified results are mean  $\pm$  SD. Sham vs untreated (NT) HI animals were first compared using a non-parametric Mann Whitney t-test (\*:  $p < 0.05$ ; \*\*:  $p < 0.01$ ; \*\*\*\*:  $p < 0.0001$ ). Then, each treatment was compared to untreated animals (HI) using a Kruskal-Wallis test followed by a Dunn's multiple comparison test when appropriate (#:  $p < 0.05$ ; ###:  $p < 0.001$ ; ####:  $p < 0.0001$ ).

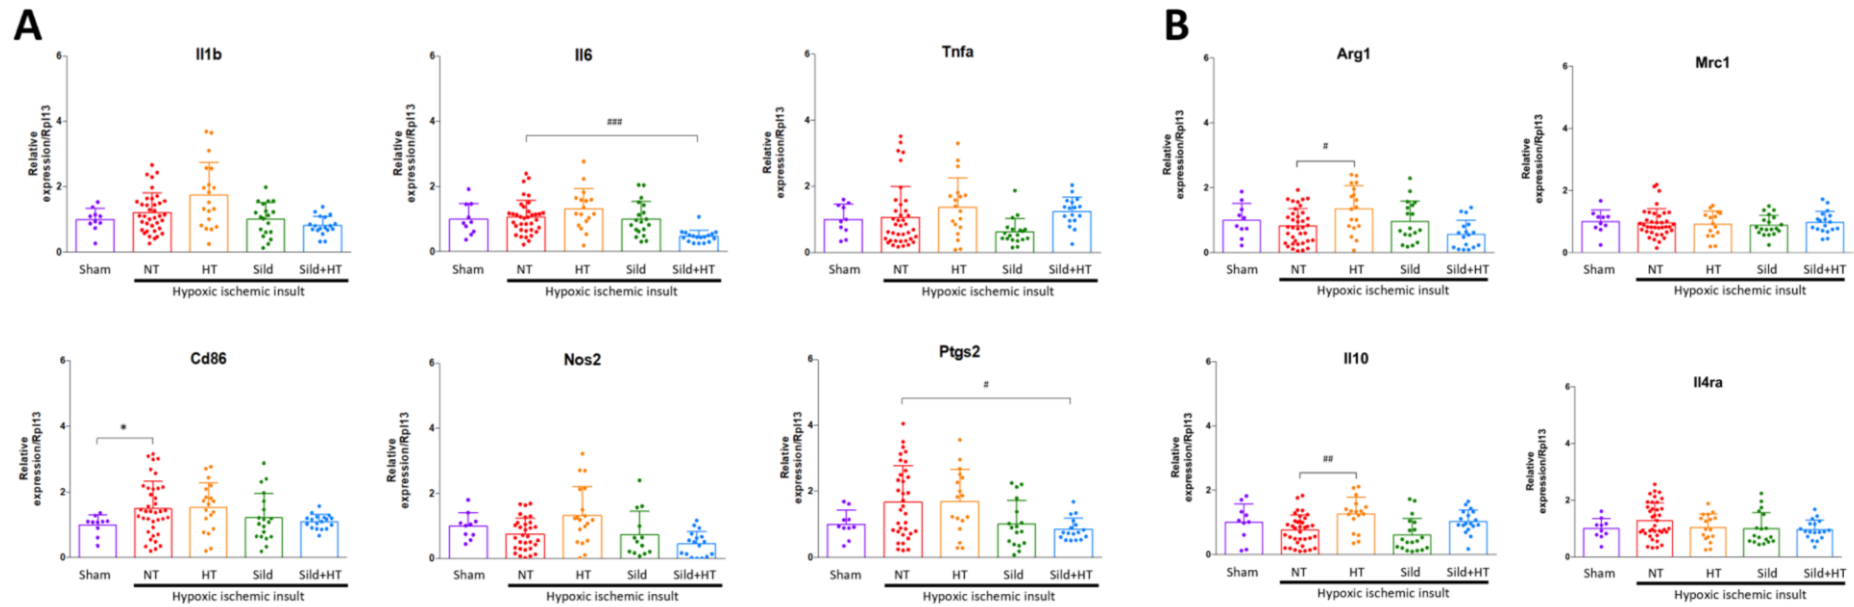

**Figure S6: Gene expression polarization in Iba1-positive MG/M $\phi$  cells sorted from the contralateral hemisphere of P13 rats subjected to HI at P11 and kept either on normothermia (HI, n=41) compared to sham (n=12), or treated by hypothermia alone (HT, n=19), Sildenafil ip alone (Sild, n=20), and the combined treatment (Sild+HT, n=18). Detailed gene expression of several pro-inflammatory (A) and immunoregulatory/anti-inflammatory markers (B). Quantified results are mean  $\pm$  SD. Sham vs untreated (NT) HI animals were first compared using a non-parametric Mann Whitney t-test (\*: p<0.05). Then, each treatment was compared to untreated animals (HI) using a Kruskal-Wallis test followed by a Dunn's multiple comparison test when appropriate (#: p<0.05; ###: p<0.001; ####: p<0.0001).**

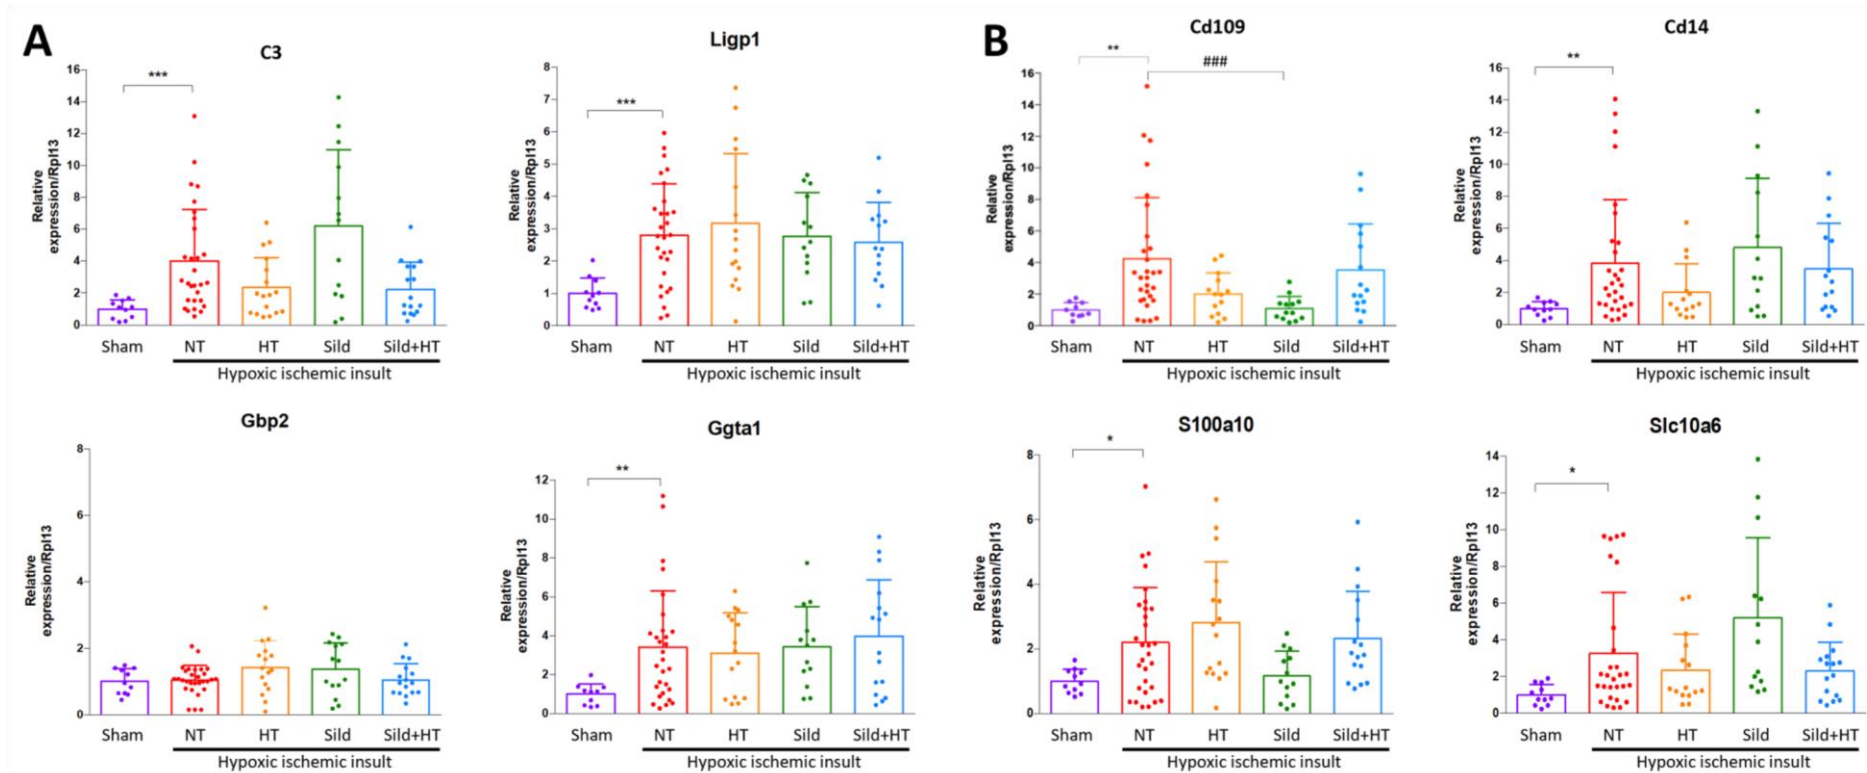

**Figure S7: Gene expression polarization in GFAP-positive astrocytes sorted from the ipsilateral hemisphere of P13 rats subjected to HI at P11 and kept either on normothermia (HI, n=41) compared to sham (n=12), or treated by hypothermia alone (HT, n=19), Sildenafil ip alone (Sild, n=20), and the combined treatment (Sild+HT, n=18).** Detailed gene expression of A1 (A) and A2 astrocytic markers (B). Quantified results are mean  $\pm$  SD. Sham vs untreated (NT) HI animals were first compared using a non-parametric Mann Whitney t-test (\*:  $p < 0.05$ ; \*\*:  $p < 0.01$ ; \*\*\*:  $p < 0.001$ ). Then, each treatment was compared to untreated animals (HI) using a Kruskal-Wallis test followed by a Dunn's multiple comparison test when appropriate (###:  $p < 0.001$ ).

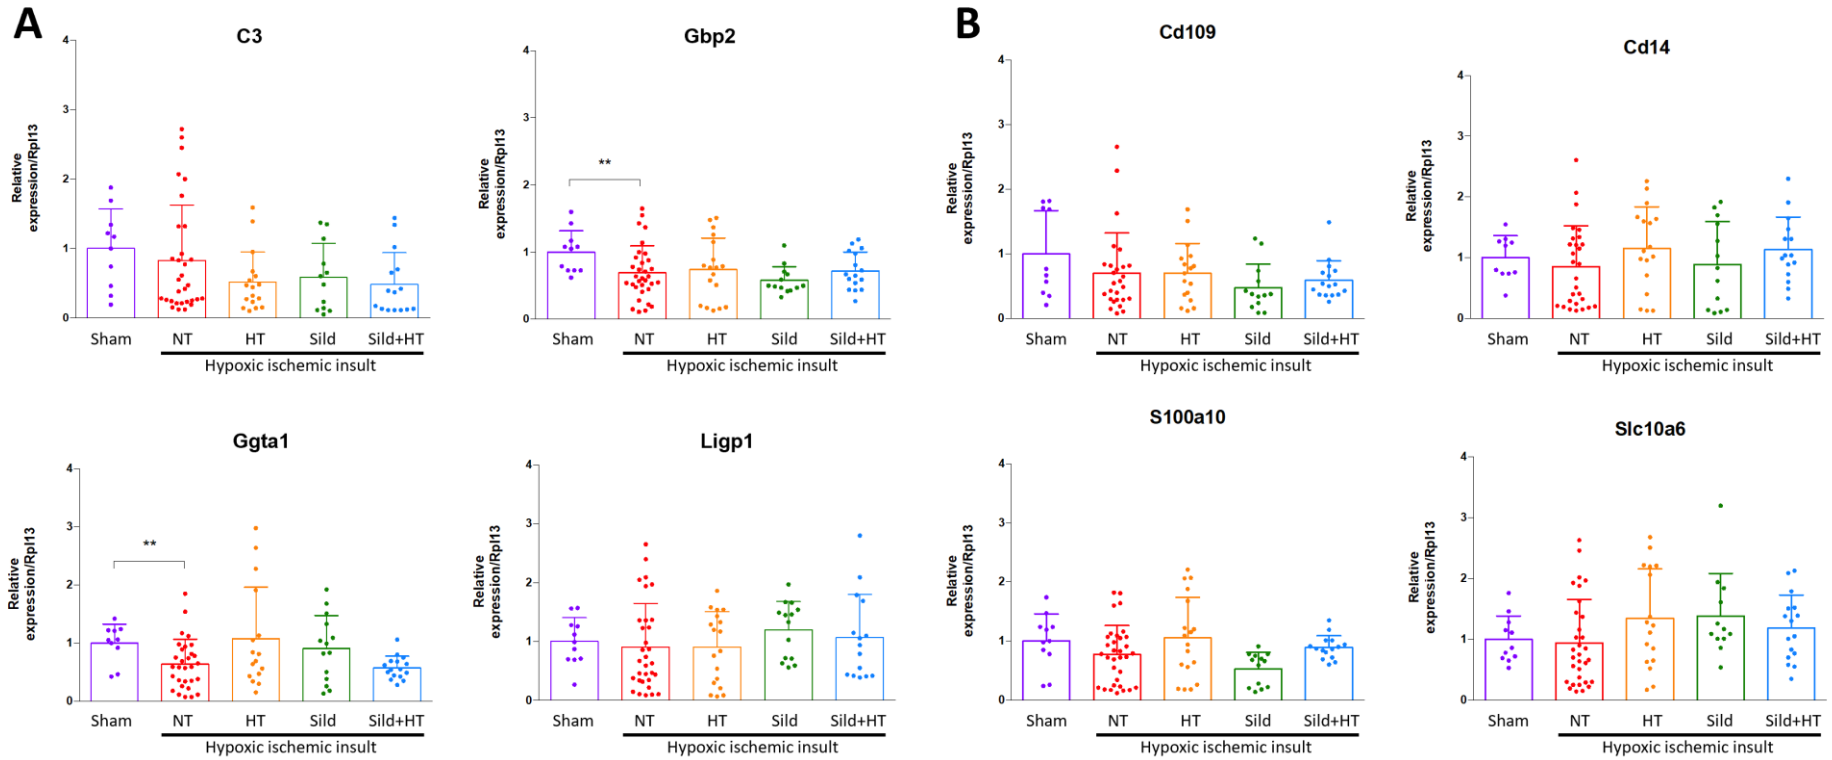

**Figure S8: Gene expression polarization in GFAP-positive astrocytes sorted from the contralateral hemisphere of P13 rats subjected to HI at P11 and kept either on normothermia (HI, n=41) compared to sham (n=12), or treated by hypothermia alone (HT, n=19), Sildenafil ip alone (Sild, n=20), and the combined treatment (Sild+HT, n=18).** Detailed gene expression of A1 (A) and A2 astrocytic markers (B). Quantified results are mean  $\pm$  SD. Sham vs untreated (NT) HI animals were first compared using a non-parametric Mann Whitney t-test (\*\*:  $p < 0.01$ ). Then, each treatment was compared to untreated animals (HI) using a Kruskal-Wallis test followed by a Dunn's multiple comparison test (all comparisons are not significant).



## HI versus Sham

| increased genes in HI compared to Sham |                                    |            |         | decreased genes in HI compared to Sham |                                                |             |           |
|----------------------------------------|------------------------------------|------------|---------|----------------------------------------|------------------------------------------------|-------------|-----------|
| 62 genes                               |                                    |            |         | 82 genes                               |                                                |             |           |
| Gene Set                               | Description                        | P Value    | FDR     | Gene Set                               | Description                                    | P Value     | FDR       |
| GO:0015850                             | organic hydroxy compound transport | 0.00016977 | 0.10237 | GO:0034612                             | response to tumor necrosis factor              | 0.000013007 | 0.0039818 |
| GO:0006820                             | anion transport                    | 0.00058586 | 0.17529 | GO:0098754                             | detoxification                                 | 0.000013207 | 0.0039818 |
| GO:0061024                             | membrane organization              | 0.00096955 | 0.17529 | GO:0009617                             | response to bacterium                          | 0.000036368 | 0.0073100 |
| GO:0015849                             | organic acid transport             | 0.0011628  | 0.17529 | GO:0097237                             | cellular response to toxic substance           | 0.00024168  | 0.036434  |
|                                        |                                    |            |         | GO:0070555                             | response to interleukin-1                      | 0.00033296  | 0.040155  |
|                                        |                                    |            |         | GO:0050900                             | leukocyte migration                            | 0.00041856  | 0.042065  |
|                                        |                                    |            |         | GO:0001101                             | response to acid chemical                      | 0.00050503  | 0.043504  |
|                                        |                                    |            |         | GO:0042476                             | odontogenesis                                  | 0.0011917   | 0.081627  |
|                                        |                                    |            |         | GO:0045087                             | innate immune response                         | 0.0012183   | 0.081627  |
|                                        |                                    |            |         | GO:0046677                             | response to antibiotic                         | 0.0013845   | 0.083488  |
|                                        |                                    |            |         | GO:0052547                             | regulation of peptidase activity               | 0.0017749   | 0.086590  |
|                                        |                                    |            |         | GO:0098542                             | defense response to other organism             | 0.0018514   | 0.086590  |
|                                        |                                    |            |         | GO:0006575                             | cellular modified amino acid metabolic process | 0.0018668   | 0.086590  |
|                                        |                                    |            |         | GO:0009611                             | response to wounding                           | 0.0022846   | 0.091842  |
|                                        |                                    |            |         | GO:0098609                             | cell-cell adhesion                             | 0.0022846   | 0.091842  |
|                                        |                                    |            |         | GO:0042330                             | taxis                                          | 0.0025567   | 0.096356  |
|                                        |                                    |            |         | GO:0007584                             | response to nutrient                           | 0.0035741   | 0.12678   |
|                                        |                                    |            |         | GO:0010038                             | response to metal ion                          | 0.0051520   | 0.16493   |
|                                        |                                    |            |         | GO:0006954                             | inflammatory response                          | 0.0051967   | 0.16493   |
|                                        |                                    |            |         | GO:0071559                             | response to transforming growth factor beta    | 0.0072644   | 0.21902   |
|                                        |                                    |            |         | GO:0032094                             | response to food                               | 0.0082701   | 0.22668   |
|                                        |                                    |            |         | GO:0071825                             | protein-lipid complex subunit organization     | 0.0082701   | 0.22668   |

## Sild+HT HI versus untreated HI

| increased genes in Sild+HT compared to HI |                                      |              |           | decreased genes in Sild+HT compared to HI |             |         |     |
|-------------------------------------------|--------------------------------------|--------------|-----------|-------------------------------------------|-------------|---------|-----|
| 18 genes                                  |                                      |              |           | 11 genes                                  |             |         |     |
| Gene Set                                  | Description                          | P Value      | FDR       | Gene Set                                  | Description | P Value | FDR |
| GO:0009617                                | response to bacterium                | 0.0000088987 | 0.0053659 | no pathway                                |             |         |     |
| GO:0009620                                | response to fungus                   | 0.00037213   | 0.11220   |                                           |             |         |     |
| GO:0097237                                | cellular response to toxic substance | 0.00091881   | 0.12213   |                                           |             |         |     |
| GO:0052547                                | regulation of peptidase activity     | 0.00098866   | 0.12213   |                                           |             |         |     |
| GO:0098542                                | defense response to other organism   | 0.0010127    | 0.12213   |                                           |             |         |     |

Inversely regulated pathways  
Aat logF<sub>c</sub> > 1,3, p-value < 0.05  
and FDR < 0.25

Figure S9: Over-representation analysis (ORA) using GeneOntology/biological process non redundant of the proteome of MG/M $\square$  cells sorted from the ipsilateral hemisphere of P13 rats subjected to HI at P11 without and with neuroprotective treatment Sild+HT. This ORA analysis was performed to identify the enriched genesets inversely regulated by HI and in HI-injured animals treated by Sild+HT. GO pathways defined by logFC > 1,3, p-value < 0.05 and FDR < 0.25 were considered significantly up or downregulated. Four genesets were identified as inversely deregulated (highlighted in yellow).

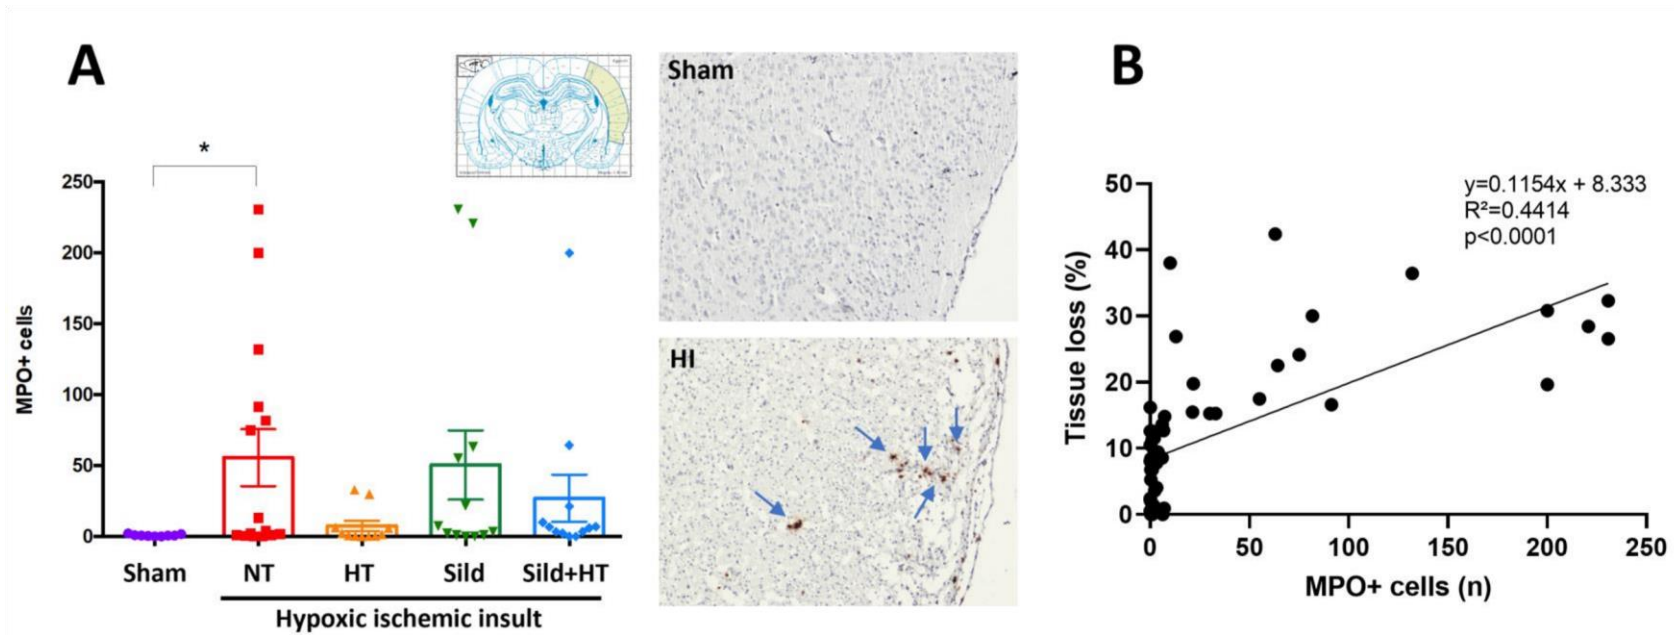

**Figure S10: Neutrophilic infiltration in the lesion site.**

Quantification of MPO+ cells within S1 cortical brain area, and typical pictures of labelled cells in Sham and HI animals (A). Data are expressed as mean  $\pm$  SD. Sham vs untreated (NT) HI animals were compared using a non-parametric Mann Whitney t-test (\*:  $p<0.05$ ). Linear regression between lesion size and MPO+ cells density in each animals (B).

**Table S1** : Primers sequences used for RT-qPCR.

|                       |       | <b>Microglia</b>                                         |         | <b>Astrocyte</b>                               |  |
|-----------------------|-------|----------------------------------------------------------|---------|------------------------------------------------|--|
|                       |       | <b>M1</b>                                                |         | <b>A1</b>                                      |  |
| pro-inflammatory      | Ccl9  | GAAGCGTGAAACTGCCAGC<br>CTGTGACGAGGCTAGGTGTG              | C3      | GCCTCTACCATGTGCTACC<br>ATCGAGGATGGTTCAGGGGA    |  |
|                       | Cd86  | AATCCTTTTCTCGGTGTTGG<br>CTCGGGCTTATGTTTTGAGC             | Gbp2    | TAAAGGTCCGAGGCCCAAAC<br>AACATATGTGGCTGGGCGAA   |  |
|                       | IL1b  | CACCTCTCAAGCAGAGCACAG<br>GGTTCCATGGTGAAGTCAAC            | Ggta1   | TCTCAGGATCTGGGAGTTGGA<br>GAGTTCTATGGAGCTCCCGC  |  |
|                       | IL6   | TCCTACCCCAACTTCCAATGCTC<br>TTGGATGGTCTTGGTCTTAGCC        | Ligp1   | ATTTGGCTCGAAGCCTTTGC<br>ACGGCATTGCCAGTCCTTA    |  |
|                       | Nos2  | AAGAACTCGGGCATACTTCAG<br>GTCATGAGCAAAGGCACAGAAC          |         |                                                |  |
|                       | Ptgs2 | TCC TCC TGT GGC TGA TGA CT<br>CGG GAT GAA CTC TCT CCT CA |         |                                                |  |
|                       | Tnfa  | AAATGGGCTCCCTCTCATCAGTTC<br>TCTGCTTGGTGGTTTGCTACGAC      |         |                                                |  |
|                       |       | <b>M2</b>                                                |         | <b>A2</b>                                      |  |
| anti-inflammatory     | Arg1  | GGCGTTGACCTTGTCTTGTT<br>GTGATGCCCCAGATGACTTT             | Cd14    | TCAGAATCTACCGACCATGAAGC<br>GGACACTTTCTCGTCCTGG |  |
|                       | Mrc1  | GACAGACGGACGAGGAGTTC<br>GCCACCAATCACAACAACAC             | Cd109   | GTCGCTCACAGGTACCTCAA<br>CTGTGAAGTTGAGCGTTGGC   |  |
|                       | Il4ra | ACTGGCTGGAAGTGTGGTCT<br>CATTGGTGTGGAGTGTGAGG             | Slc10a6 | TCCATAGAGACCGGAGCACA<br>ATGCCTGATATGCTGCGACA   |  |
|                       | Il10  | CCTGCTTTACTGGCTGGAG<br>TTGTCCAGCTGGTCTTCTT               | S100a10 | GAAAGGGAGTTCCTGGGTT<br>CCCCTTTTCCATCTCGGCA     |  |
| <b>reference gene</b> |       |                                                          |         |                                                |  |
|                       | Rpl13 | TCCGAAGAAGGGAGACAGTT<br>CTTCTCCTTCCGTGATGG               |         |                                                |  |

**Table S2: Analyses of main endpoints according to sex and interaction between sex and each variable analyzed.**

Quantified results are mean  $\pm$  SD or SEM. Sham vs untreated (NT) HI animals were first compared using a non-parametric Mann Whitney t-test (\*:  $p < 0.05$ ; \*\*:  $p < 0.01$ ; \*\*\*:  $p < 0.001$ ; \*\*\*\*:  $p < 0.0001$ ). Then, each treatment was compared to untreated animals (HI) using a Kruskal-Wallis test followed by a Dunn's multiple comparison test when appropriate (#:  $p < 0.05$ ; ##:  $p < 0.01$ ; ###:  $p < 0.001$ ). Two-way ANOVA was used to assess interaction between sex and treatment.

|                      |          | SHAM     |          | HI        |           | Interaction Sham vs HI | HT       |           | Interaction HT vs HI | SILD      |           | Interaction Sild vs HI | SILD + HT |           | Interaction SildHT vs HI |
|----------------------|----------|----------|----------|-----------|-----------|------------------------|----------|-----------|----------------------|-----------|-----------|------------------------|-----------|-----------|--------------------------|
|                      |          | F        | M        | F         | M         |                        | F        | M         |                      | F         | M         |                        | F         | M         |                          |
| <b>Histology</b>     | <b>N</b> | <b>6</b> | <b>3</b> | <b>16</b> | <b>15</b> |                        | <b>8</b> | <b>9</b>  |                      | <b>11</b> | <b>12</b> |                        | <b>9</b>  | <b>14</b> |                          |
| Lesion size (cortex) | Mean     | 0.53     | 0.62     | 15.54**** | 18.46**   | P=0.7676               | 8.47     | 9.83      | P=0.8297             | 15.01     | 13.62     | P=0.5485               | 11.79     | 11.01     | P=0.5860                 |
|                      | SD       | 0.41     | 1.22     | 2.53      | 4.31      |                        | 2.62     | 2.75      |                      | 3.85      | 3.21      |                        | 1.76      | 3.15      |                          |
| <b>ICC</b>           | <b>N</b> | <b>6</b> | <b>3</b> | <b>16</b> | <b>15</b> |                        | <b>8</b> | <b>9</b>  |                      | <b>11</b> | <b>12</b> |                        | <b>9</b>  | <b>14</b> |                          |
| Iba1 (full)          | Mean     | 1.00     | 1.00     | 1.81***   | 2.03**    | P=0.4898               | 1.74     | 1.42      | P=0.1319             | 1.52      | 1.80      | P=0.6658               | 1.41      | 1.38      | P=0.2600                 |
|                      | Sem      | 0.04     | 0.02     | 0.14      | 0.30      |                        | 0.23     | 0.12      |                      | 0.15      | 0.16      |                        | 0.10      | 0.12      |                          |
| GFAP (full)          | Mean     | 1.26     | 0.87     | 1.97      | 2.38**    | P=0.3845               | 1.45     | 2.26      | P=0.4166             | 1.67      | 1.76      | P=0.6964               | 1.49      | 1.47      | P=0.5305                 |
|                      | Sem      | 0.05     | 0.04     | 0.28      | 0.28      |                        | 0.21     | 0.35      |                      | 0.22      | 0.27      |                        | 0.15      | 0.18      |                          |
| <b>qPCR</b>          | <b>N</b> | <b>4</b> | <b>6</b> | <b>23</b> | <b>16</b> |                        | <b>8</b> | <b>11</b> |                      | <b>11</b> | <b>10</b> |                        | <b>10</b> | <b>8</b>  |                          |
| Il1b                 | Mean     | 0.89     | 1.08     | 1.75*     | 1.51      | P=0.4830               | 1.49     | 0.83      | P=0.5257             | 1.02      | 0.98      | P=0.5995               | 0.67####  | 0.46##    | P=0.8324                 |
|                      | Sem      | 0.20     | 0.14     | 0.20      | 0.27      |                        | 0.19     | 0.18      |                      | 0.13      | 0.12      |                        | 0.11      | 0.05      |                          |
| Il6                  | Moy      | 1.04     | 0.97     | 1.15      | 0.99      | P=0.8792               | 0.85     | 0.77      | P=0.8507             | 0.77      | 0.57      | P=0.9418               | 0.27####  | 0.37##    | P=0.5442                 |

|       |     |      |      |         |         |                 |                   |      |          |                    |      |                 |                    |                    |          |
|-------|-----|------|------|---------|---------|-----------------|-------------------|------|----------|--------------------|------|-----------------|--------------------|--------------------|----------|
|       | Sem | 0.26 | 0.33 | 0.19    | 0.19    |                 | 0.12              | 0.17 |          | 0.12               | 0.08 |                 | 0.03               | 0.08               |          |
| Tnfa  | Moy | 1.04 | 0.97 | 0.95    | 0.71    | P=0.7885        | 1.10              | 0.77 | P=0.8602 | 0.35               | 0.36 | P=0.5950        | 0.60               | 0.76               | P=0.4054 |
|       | Sem | 0.31 | 0.12 | 0.24    | 0.16    |                 | 0.17              | 0.25 |          | 0.06               | 0.08 |                 | 0.08               | 0.16               |          |
| Cd86  | Moy | 1.03 | 0.98 | 2.04**  | 2.02**  | P=0.9683        | 2.29              | 1.82 | P=0.3141 | 1.28 <sup>#</sup>  | 2.12 | <b>P=0.0418</b> | 1.30 <sup>#</sup>  | 1.05 <sup>##</sup> | P=0.5080 |
|       | Sem | 0.15 | 0.20 | 0.16    | 0.20    |                 | 0.24              | 0.22 |          | 0.20               | 0.23 |                 | 0.07               | 0.09               |          |
| Nos2  | Moy | 0.89 | 1.08 | 2.93*   | 2.63    | P=0.6691        | 1.56              | 1.54 | P=0.7900 | 2.13               | 1.62 | P=0.8524        | 0.83 <sup>##</sup> | 0.87 <sup>#</sup>  | P=0.7465 |
|       | Sem | 0.32 | 0.25 | 0.46    | 0.51    |                 | 0.31              | 0.29 |          | 0.32               | 0.30 |                 | 0.14               | 0.22               |          |
| Ptgs2 | Moy | 1.29 | 0.81 | 3.22*** | 2.70*** | P=0.9853        | 4.08              | 2.52 | P=0.2256 | 2.33               | 2.52 | P=0.4737        | 2.01               | 2.02               | P=0.5860 |
|       | Sem | 0.14 | 0.07 | 0.31    | 0.42    |                 | 0.49              | 0.46 |          | 0.49               | 0.47 |                 | 0.35               | 0.47               |          |
| Arg1  | Moy | 1.10 | 0.93 | 2.28    | 2.22*   | P=0.9143        | 1.84              | 1.35 | P=0.5770 | 2.69               | 1.72 | P=0.2823        | 1.13               | 1.37               | P=0.6882 |
|       | Sem | 0.21 | 0.20 | 0.37    | 0.33    |                 | 0.26              | 0.31 |          | 0.65               | 0.28 |                 | 0.19               | 0.27               |          |
| Mrc1  | Moy | 0.93 | 1.05 | 0.61*   | 0.71*   | P=0.8963        | 1.08 <sup>#</sup> | 0.80 | P=0.1112 | 0.40               | 0.62 | P=0.4691        | 0.53               | 0.57               | P=0.7364 |
|       | Sem | 0.11 | 0.11 | 0.06    | 0.09    |                 | 0.16              | 0.18 |          | 0.05               | 0.11 |                 | 0.06               | 0.09               |          |
| Il10  | Moy | 0.67 | 1.22 | 0.20*   | 0.34*** | <b>P=0.0570</b> | 0.41              | 0.47 | P=0.6715 | 0.17               | 0.20 | P=0.3844        | 0.19               | 0.30               | P=0.8866 |
|       | Sem | 0.30 | 0.16 | 0.04    | 0.07    |                 | 0.11              | 0.15 |          | 0.05               | 0.06 |                 | 0.06               | 0.08               |          |
| Il4ra | Moy | 0.99 | 1.01 | 1.51    | 1.37    | P=0.7742        | 1.72              | 0.99 | P=0.2987 | 0.74 <sup>##</sup> | 1.25 | P=0.1935        | 0.90               | 0.80               | P=0.8033 |
|       | Sem | 0.10 | 0.14 | 0.18    | 0.19    |                 | 0.11              | 0.21 |          | 0.10               | 0.19 |                 | 0.03               | 0.08               |          |

**S3:** ORA analyses looking for deregulated biological processes in the HI group compared to the Sham group, depending on various the statistical thresholds.

| S/HI                    | Upregulated genes in HI compared to Sham<br>35 prot |                                    |            |            | downregulated genes in HI compared to Sham<br>43 genes |                                      |              |            |                        |           |         |
|-------------------------|-----------------------------------------------------|------------------------------------|------------|------------|--------------------------------------------------------|--------------------------------------|--------------|------------|------------------------|-----------|---------|
|                         | Gene Set                                            | Description                        | P Value    | FDR        | Gene Set                                               | Description                          | P Value      | FDR        |                        |           |         |
| P<0,05 et<br>logFc >1,5 | GO:0015850                                          | organic hydroxy compound transport | 0.00019832 | 0.11959    | GO:0034612                                             | response to tumor necrosis factor    | 0.0000045705 | 0.0027560  |                        |           |         |
|                         | GO:0006897                                          | endocytosis                        | 0.00050432 | 0.15205    | GO:0009617                                             | response to bacterium                | 0.00013414   | 0.040443   |                        |           |         |
|                         |                                                     |                                    |            |            | GO:0098542                                             | defense response to other organism   | 0.00074791   | 0.15033    |                        |           |         |
|                         |                                                     |                                    |            |            |                                                        |                                      |              | GO:0045087 | innate immune response | 0.0010980 | 0.16552 |
| P<0,05 et<br>logFc >1,3 | <b>62 prot</b>                                      |                                    |            |            | <b>82 genes</b>                                        |                                      |              |            |                        |           |         |
|                         | Gene Set                                            | Description                        | P Value    | FDR        | Gene Set                                               | Description                          | P Value      | FDR        |                        |           |         |
|                         | GO:0015850                                          | organic hydroxy compound transport | 0.00016977 | 0.10237    | GO:0034612                                             | response to tumor necrosis factor    | 0.000013007  | 0.0039818  |                        |           |         |
|                         | GO:0006820                                          | anion transport                    | 0.00058586 | 0.17529    | GO:0098754                                             | detoxification                       | 0.000013207  | 0.0039818  |                        |           |         |
|                         | GO:0061024                                          | membrane organization              | 0.00096955 | 0.17529    | GO:0009617                                             | response to bacterium                | 0.000036368  | 0.0073100  |                        |           |         |
|                         | GO:0015849                                          | organic acid transport             | 0.0011628  | 0.17529    | GO:0097237                                             | cellular response to toxic substance | 0.00024168   | 0.036434   |                        |           |         |
|                         |                                                     |                                    |            | GO:0070555 | response to interleukin-1                              | 0.00033296                           | 0.040155     |            |                        |           |         |
|                         |                                                     |                                    |            | GO:0050900 | leukocyte migration                                    | 0.00041856                           | 0.042065     |            |                        |           |         |
|                         |                                                     |                                    |            | GO:0001101 | response to acid chemical                              | 0.00050503                           | 0.043504     |            |                        |           |         |
|                         |                                                     |                                    |            | GO:0042476 | odontogenesis                                          | 0.0011917                            | 0.081627     |            |                        |           |         |
|                         |                                                     |                                    |            | GO:0045087 | innate immune response                                 | 0.0012183                            | 0.081627     |            |                        |           |         |
|                         |                                                     |                                    |            | GO:0046677 | response to antibiotic                                 | 0.0013845                            | 0.083488     |            |                        |           |         |
|                         |                                                     |                                    |            | GO:0052547 | regulation of peptidase activity                       | 0.0017749                            | 0.086590     |            |                        |           |         |
|                         |                                                     |                                    |            | GO:0098542 | defense response to other organism                     | 0.0018514                            | 0.086590     |            |                        |           |         |
|                         |                                                     |                                    |            | GO:0006575 | cellular modified amino acid metabolic process         | 0.0018668                            | 0.086590     |            |                        |           |         |
|                         |                                                     |                                    |            | GO:0009611 | response to wounding                                   | 0.0022846                            | 0.091842     |            |                        |           |         |
|                         |                                                     |                                    |            | GO:0098609 | cell-cell adhesion                                     | 0.0022846                            | 0.091842     |            |                        |           |         |
|                         |                                                     |                                    |            | GO:0042330 | taxis                                                  | 0.0025567                            | 0.096356     |            |                        |           |         |
|                         |                                                     |                                    |            | GO:0007584 | response to nutrient                                   | 0.0035741                            | 0.12678      |            |                        |           |         |
|                         |                                                     |                                    |            | GO:0010038 | response to metal ion                                  | 0.0051520                            | 0.16493      |            |                        |           |         |
|                         |                                                     |                                    |            | GO:0006954 | inflammatory response                                  | 0.0051967                            | 0.16493      |            |                        |           |         |
|                         |                                                     |                                    |            | GO:0071559 | response to transforming growth factor beta            | 0.0072644                            | 0.21902      |            |                        |           |         |
|                         |                                                     |                                    |            | GO:0032094 | response to food                                       | 0.0082701                            | 0.22668      |            |                        |           |         |
|                         |                                                     |                                    |            | GO:0071825 | protein-lipid complex subunit organization             | 0.0082701                            | 0.22668      |            |                        |           |         |

Table

| 1229 genes |                                                    | 838 genes   |            |
|------------|----------------------------------------------------|-------------|------------|
| Gene Set   | Description                                        | P Value     | FDR        |
| GO:0043043 | peptide biosynthetic process                       | 3.0801e-7   | 0.00018573 |
| GO:0022613 | ribonucleoprotein complex biogenesis               | 0.000076792 | 0.019676   |
| GO:0006839 | mitochondrial transport                            | 0.00011136  | 0.019676   |
| GO:0006605 | protein targeting                                  | 0.00013052  | 0.019676   |
| GO:0051604 | protein maturation                                 | 0.00022628  | 0.027289   |
| GO:0009615 | response to virus                                  | 0.00034018  | 0.034188   |
| GO:0016197 | endosomal transport                                | 0.00042629  | 0.036722   |
| GO:0055088 | lipid homeostasis                                  | 0.00050198  | 0.037837   |
| GO:0090407 | organophosphate biosynthetic process               | 0.00093802  | 0.059649   |
| GO:0008610 | lipid biosynthetic process                         | 0.00098921  | 0.059649   |
| GO:0140053 | mitochondrial gene expression                      | 0.0011186   | 0.060243   |
| GO:0072348 | sulfur compound transport                          | 0.0011989   | 0.060243   |
| GO:0090662 | ATP hydrolysis coupled transmembrane transport     | 0.0014628   | 0.067852   |
| GO:0106027 | neuron projection organization                     | 0.0020974   | 0.085506   |
| GO:0072594 | establishment of protein localization to organelle | 0.0021270   | 0.085506   |
| GO:0072657 | protein localization to membrane                   | 0.0025694   | 0.092332   |
| GO:0006644 | phospholipid metabolic process                     | 0.0027369   | 0.092332   |
| GO:0019216 | regulation of lipid metabolic process              | 0.0027562   | 0.092332   |
| GO:0050435 | amyloid-beta metabolic process                     | 0.0029388   | 0.093269   |
| GO:0018209 | peptidyl-serine modification                       | 0.0041872   | 0.12054    |
| GO:0006820 | anion transport                                    | 0.0041978   | 0.12054    |
| GO:0071806 | protein transmembrane transport                    | 0.0050929   | 0.13565    |
| GO:0046486 | glycerolipid metabolic process                     | 0.0052967   | 0.13565    |
| GO:0097006 | regulation of plasma lipoprotein particle levels   | 0.0055312   | 0.13565    |
| GO:0019693 | ribose phosphate metabolic process                 | 0.0056406   | 0.13565    |
| GO:0019882 | antigen processing and presentation                | 0.0058579   | 0.13565    |
| GO:0007005 | mitochondrion organization                         | 0.0062416   | 0.13565    |
| GO:0015849 | organic acid transport                             | 0.0062988   | 0.13565    |
| GO:0044419 | interspecies interaction between organisms         | 0.0067994   | 0.14138    |
| GO:0010876 | lipid localization                                 | 0.0071991   | 0.14383    |
| GO:0050817 | coagulation                                        | 0.0073942   | 0.14383    |
| GO:1901652 | response to peptide                                | 0.0077324   | 0.14571    |
| GO:0001101 | response to acid chemical                          | 0.0079826   | 0.14586    |
| GO:0034660 | ncRNA metabolic process                            | 0.0084145   | 0.14923    |
| GO:0060759 | regulation of response to cytokine stimulus        | 0.0089323   | 0.15389    |
| GO:0051259 | protein complex oligomerization                    | 0.0098561   | 0.16509    |
| GO:0006753 | nucleoside phosphate metabolic process             | 0.012758    | 0.20792    |
| GO:0070585 | protein localization to mitochondrion              | 0.013958    | 0.22149    |
| GO:0042176 | regulation of protein catabolic process            | 0.015621    | 0.24153    |
| GO:0072511 | divalent inorganic cation transport                | 0.016164    | 0.24332    |

  

| 636 genes  |                                                    | 359 genes   |          |
|------------|----------------------------------------------------|-------------|----------|
| Gene Set   | Description                                        | P Value     | FDR      |
| GO:0016197 | endosomal transport                                | 0.000045398 | 0.025130 |
| GO:0006605 | protein targeting                                  | 0.000083350 | 0.025130 |
| GO:0022613 | ribonucleoprotein complex biogenesis               | 0.00047107  | 0.079687 |
| GO:0006839 | mitochondrial transport                            | 0.00052861  | 0.079687 |
| GO:0043043 | peptide biosynthetic process                       | 0.00075345  | 0.090866 |
| GO:0051604 | protein maturation                                 | 0.0010662   | 0.099945 |
| GO:0019216 | regulation of lipid metabolic process              | 0.0013087   | 0.099945 |
| GO:0072594 | establishment of protein localization to organelle | 0.0014625   | 0.099945 |
| GO:0008610 | lipid biosynthetic process                         | 0.0014917   | 0.099945 |
| GO:0090407 | organophosphate biosynthetic process               | 0.0025451   | 0.15347  |
| GO:0044419 | interspecies interaction between organisms         | 0.0034567   | 0.18949  |
| GO:0046486 | glycerolipid metabolic process                     | 0.0044899   | 0.22562  |

  

| Gene Set   | Description                                        | P Value     | FDR          |
|------------|----------------------------------------------------|-------------|--------------|
| GO:0008380 | RNA splicing                                       | 5.1768e-9   | 0.0000031216 |
| GO:0016071 | mRNA metabolic process                             | 0.000048388 | 0.0014589    |
| GO:0042063 | gliogenesis                                        | 0.000074169 | 0.014908     |
| GO:0009617 | response to bacterium                              | 0.00019255  | 0.029028     |
| GO:0006979 | response to oxidative stress                       | 0.00098923  | 0.11930      |
| GO:0007584 | response to nutrient                               | 0.0014919   | 0.12485      |
| GO:0010038 | response to metal ion                              | 0.0016123   | 0.12485      |
| GO:0042476 | odontogenesis                                      | 0.0016564   | 0.12485      |
| GO:0046677 | response to antibiotic                             | 0.0021537   | 0.13338      |
| GO:0010720 | positive regulation of cell development            | 0.0022120   | 0.13338      |
| GO:0014074 | response to purine-containing compound             | 0.0031400   | 0.15917      |
| GO:0071407 | cellular response to organic cyclic compound       | 0.0031996   | 0.15917      |
| GO:0006403 | RNA localization                                   | 0.0034316   | 0.15917      |
| GO:0051346 | negative regulation of hydrolase activity          | 0.0039294   | 0.16214      |
| GO:0061008 | hepaticobiliary system development                 | 0.0042852   | 0.16214      |
| GO:0061458 | reproductive system development                    | 0.0043023   | 0.16214      |
| GO:0032355 | response to estradiol                              | 0.0048926   | 0.16668      |
| GO:0015931 | nucleobase-containing compound transport           | 0.0049754   | 0.16668      |
| GO:0035690 | cellular response to drug                          | 0.0056972   | 0.18081      |
| GO:0043543 | protein acylation                                  | 0.0062867   | 0.18954      |
| GO:0097237 | cellular response to toxic substance               | 0.0070300   | 0.20186      |
| GO:0048511 | rhythmic process                                   | 0.0078012   | 0.20814      |
| GO:0009792 | embryo development ending in birth or egg hatching | 0.0079392   | 0.20814      |

**S4:** ORA analyses looking for deregulated biological processes in the HI+hypothermia group (HT) compared to the HI untreated group, depending on various the statistical thresholds.

|                                                   | Upregulated in HT compared to HI |             |              |             | Downregulated in HT compared to HI |            |                                                                 |             |
|---------------------------------------------------|----------------------------------|-------------|--------------|-------------|------------------------------------|------------|-----------------------------------------------------------------|-------------|
|                                                   | p<0.05                           | p<0.05      | P<0.05       | P<0.01      | p<0.05                             | p<0.05     | P<0.05                                                          | P<0.01      |
|                                                   | logFc>1.5                        | logFc>1.3   | logFc>0      | logFc>0     | logFc>1.5                          | logFc>1.3  | logFc>0                                                         | logFc>0     |
|                                                   | 6 proteins                       | 13 proteins | 165 proteins | 28 proteins | 2 proteins                         | 3 proteins | 402 proteins                                                    | 70 proteins |
| ORA genontology / Biological process no redundant | NA                               | ns          | ns           | ns          | NA                                 | NA         | ns                                                              | ns          |
| ORA PATHWAY Reactome                              | NA                               | ns          | ns           | ns          | NA                                 | NA         | DNA Damage Recognition in GG-NER<br>Regulation of KIT signaling | ns          |
| FDR<0.05                                          |                                  |             |              |             |                                    |            |                                                                 |             |
| FDR<0.25                                          |                                  |             |              |             |                                    |            |                                                                 |             |

**Table S5:** ORA analyses looking for deregulated biological processes in the HI+Sildenafil group (Sild) compared to the HI untreated group, depending on various the statistical thresholds.

|                                                   | Upregulated in sild compared to HI |            |                                                                                                                                          |             | Downregulated in sild compared to HI |             |              |                                |
|---------------------------------------------------|------------------------------------|------------|------------------------------------------------------------------------------------------------------------------------------------------|-------------|--------------------------------------|-------------|--------------|--------------------------------|
|                                                   | p<0.05                             | p<0.05     | P<0.05                                                                                                                                   | P<0.01      | p<0.05                               | p<0.05      | P<0.05       | P<0.01                         |
|                                                   | logFc>1.5                          | logFc>1.3  | logFc>0                                                                                                                                  | logFc>0     | logFc>1.5                            | logFc>1.3   | logFc>0      | logFc>0                        |
|                                                   | 4 proteins                         | 7 proteins | 268 proteins                                                                                                                             | 58 proteins | 8 proteins                           | 11 proteins | 467 proteins | 127 proteins                   |
| ORA genontology / Biological process no redundant | NA                                 | NA         | organophosphate biosynthetic process                                                                                                     | ns          | ns                                   | ns          | ns           | ns                             |
| ORA PATHWAY Reactome                              | NA                                 | NA         | Purine ribonucleoside monophosphate biosynthesis<br>Nucleobase biosynthesis<br>The phototransduction cascade<br>Visual phototransduction | ns          | NA                                   | ns          | ns           | Interleukin-1 family signaling |
| FDR<0.05                                          |                                    |            |                                                                                                                                          |             |                                      |             |              |                                |
| FDR<0.25                                          |                                    |            |                                                                                                                                          |             |                                      |             |              |                                |



**Table**

**S6:** ORA analyses looking for deregulated biological processes in the HI+Hypothermia+Sildenafil group (SildHT) compared to the HI untreated group, depending on various the statistical thresholds.

|                                                          | Upregulated in sildHT compared to HI                                                                                                                                                                                                                                                                                           |                                                                                                                                                                                                                                         |                                                                                                                                                                                                                                                                                                                                                                                                                                                                                  |                        | Downregulated in sildHT compared to HI |             |              |                                                           |
|----------------------------------------------------------|--------------------------------------------------------------------------------------------------------------------------------------------------------------------------------------------------------------------------------------------------------------------------------------------------------------------------------|-----------------------------------------------------------------------------------------------------------------------------------------------------------------------------------------------------------------------------------------|----------------------------------------------------------------------------------------------------------------------------------------------------------------------------------------------------------------------------------------------------------------------------------------------------------------------------------------------------------------------------------------------------------------------------------------------------------------------------------|------------------------|----------------------------------------|-------------|--------------|-----------------------------------------------------------|
|                                                          | p<0.05                                                                                                                                                                                                                                                                                                                         | p<0.05                                                                                                                                                                                                                                  | P<0.05                                                                                                                                                                                                                                                                                                                                                                                                                                                                           | P<0.01                 | p<0.05                                 | p<0.05      | P<0.05       | P<0.01                                                    |
|                                                          | logFc>1.5                                                                                                                                                                                                                                                                                                                      | logFc>1.3                                                                                                                                                                                                                               | logFc>0                                                                                                                                                                                                                                                                                                                                                                                                                                                                          | logFc>0                | logFc>1.5                              | logFc>1.3   | logFc>0      | logFc>0                                                   |
|                                                          | 12 proteins                                                                                                                                                                                                                                                                                                                    | 18 proteins                                                                                                                                                                                                                             | 268 proteins                                                                                                                                                                                                                                                                                                                                                                                                                                                                     | 47 proteins            | 6 proteins                             | 11 proteins | 317 proteins | 59 proteins                                               |
| <b>ORA genontology / Biological process no redundant</b> | <ul style="list-style-type: none"> <li>response to bacterium</li> <li>response to fungus</li> <li>cellular response to toxic substance</li> <li>defense response to other organism</li> <li>detoxification</li> <li>response to antibiotic</li> <li>response to oxidative stress</li> <li>response to interleukin-1</li> </ul> | <ul style="list-style-type: none"> <li>response to bacterium</li> <li>response to fungus</li> <li>cellular response to toxic substance</li> <li>regulation of peptidase activity</li> <li>defense response to other organism</li> </ul> | <ul style="list-style-type: none"> <li>response to oxidative stress</li> <li>small molecule biosynthetic process</li> <li>cellular modified amino acid biosynthetic process</li> <li>cofactor metabolic process</li> <li>detoxification</li> <li>protein complex oligomerization</li> <li>cellular modified amino acid metabolic process</li> <li>adaptive thermogenesis</li> <li>cellular response to toxic substance</li> <li>monocarboxylic acid metabolic process</li> </ul> | adaptive thermogenesis | ns                                     | ns          | ns           | cell junction organization<br>regulation of cell adhesion |
| <b>ORA PATHWAY Reactome</b>                              | <ul style="list-style-type: none"> <li>Antimicrobial peptides</li> <li>Neutrophil degranulation</li> <li>Activation of Matrix Metalloproteinases</li> <li>Innate Immune System</li> <li>Degradation of the extracellular matrix</li> </ul>                                                                                     | <ul style="list-style-type: none"> <li>Antimicrobial peptides</li> <li>Neutrophil degranulation</li> <li>Activation of Matrix Metalloproteinases</li> <li>Innate Immune System</li> </ul>                                               | <ul style="list-style-type: none"> <li>Innate Immune System</li> <li>Immune System</li> <li>Neutrophil degranulation</li> </ul>                                                                                                                                                                                                                                                                                                                                                  | ns                     | ns                                     | ns          | ns           | ns                                                        |
| <b>FDR&lt;0.05</b>                                       |                                                                                                                                                                                                                                                                                                                                |                                                                                                                                                                                                                                         |                                                                                                                                                                                                                                                                                                                                                                                                                                                                                  |                        |                                        |             |              |                                                           |
| <b>FDR&lt;0.25</b>                                       |                                                                                                                                                                                                                                                                                                                                |                                                                                                                                                                                                                                         |                                                                                                                                                                                                                                                                                                                                                                                                                                                                                  |                        |                                        |             |              |                                                           |

**S7:** GSEA analysis against reactome pathways looking for deregulated biological processes in the HI untreated group compared to the Sham group.

Table

|                                        | UP                                                                    |      |                     |         |       |          |           |
|----------------------------------------|-----------------------------------------------------------------------|------|---------------------|---------|-------|----------|-----------|
|                                        | DOWN                                                                  |      |                     |         |       |          |           |
| GSEA ANALYSIS AGAINST REACTOME PATHWAY |                                                                       |      |                     |         |       |          |           |
| Gene Set                               | Description                                                           | Size | Leading Edge Number | ES      | NES   | P Value  | FDR       |
| R-RNO-72203                            | Processing of Capped Intron-Containing Pre-mRNA                       | 176  | 90                  | 0.70828 | 2.38  | <2.2e-16 | <2.2e-16  |
| R-RNO-72163                            | mRNA Splicing - Major Pathway                                         | 136  | 69                  | 0.73432 | 2.332 | <2.2e-16 | <2.2e-16  |
| R-RNO-72172                            | mRNA Splicing                                                         | 139  | 69                  | 0.72493 | 2.305 | <2.2e-16 | <2.2e-16  |
| R-RNO-159236                           | Transport of Mature mRNA derived from an Intron-Containing Transcript | 53   | 29                  | 0.67401 | 1.922 | <2.2e-16 | 0.0063471 |
| R-RNO-72202                            | Transport of Mature Transcript to Cytoplasm                           | 53   | 29                  | 0.67401 | 1.922 | <2.2e-16 | 0.0063471 |
| R-RNO-72187                            | mRNA 3'-end processing                                                | 45   | 19                  | 0.7002  | 1.914 | <2.2e-16 | 0.0052892 |
| R-RNO-1474244                          | Extracellular matrix organization                                     | 63   | 17                  | 0.6491  | 1.888 | <2.2e-16 | 0.0090673 |
| R-RNO-73864                            | RNA Polymerase I Transcription                                        | 27   | 12                  | 0.78201 | 1.872 | <2.2e-16 | 0.0079339 |
| R-RNO-8875878                          | MET promotes cell motility                                            | 14   | 6                   | 0.87703 | 1.861 | <2.2e-16 | 0.011754  |
| R-RNO-109688                           | Cleavage of Growing Transcript in the Termination Region              | 50   | 23                  | 0.66739 | 1.806 | <2.2e-16 | 0.02308   |
| R-RNO-73856                            | RNA Polymerase II Transcription Termination                           | 50   | 23                  | 0.66739 | 1.806 | <2.2e-16 | 0.02308   |
| R-RNO-73854                            | RNA Polymerase I Promoter Clearance                                   | 26   | 11                  | 0.75174 | 1.798 | <2.2e-16 | 0.02292   |
| R-RNO-8943724                          | Regulation of PTEN gene transcription                                 | 29   | 13                  | 0.75288 | 1.787 | <2.2e-16 | 0.024412  |
| R-RNO-375165                           | NCAM signaling for neurite out-growth                                 | 15   | 3                   | 0.81758 | 1.767 | <2.2e-16 | 0.026446  |
| R-RNO-4551638                          | SUMOylation of chromatin organization proteins                        | 32   | 22                  | 0.69012 | 1.766 | <2.2e-16 | 0.026094  |
| R-RNO-3108214                          | SUMOylation of DNA damage response and repair proteins                | 44   | 27                  | 0.63916 | 1.755 | <2.2e-16 | 0.026446  |
| R-RNO-73762                            | RNA Polymerase I Transcription Initiation                             | 24   | 11                  | 0.75807 | 1.751 | <2.2e-16 | 0.028002  |
| R-RNO-2990846                          | SUMOylation                                                           | 76   | 27                  | 0.59016 | 1.734 | <2.2e-16 | 0.031735  |
| R-RNO-1500931                          | Cell-Cell communication                                               | 30   | 5                   | 0.68627 | 1.727 | <2.2e-16 | 0.033406  |
| R-RNO-3000171                          | Non-integrin membrane-ECM interactions                                | 7    | 3                   | 0.94204 | 1.724 | <2.2e-16 | 0.032793  |
| R-RNO-6805567                          | Keratinization                                                        | 23   | 7                   | 0.71994 | 1.699 | <2.2e-16 | 0.043234  |
| R-RNO-74182                            | Ketone body metabolism                                                | 6    | 3                   | 0.91065 | 1.691 | <2.2e-16 | 0.045699  |
| R-RNO-3108232                          | SUMO E3 ligases SUMOylate target proteins                             | 74   | 26                  | 0.57899 | 1.678 | <2.2e-16 | 0.052485  |
| R-RNO-5625740                          | RHO GTPases activate PKNs                                             | 18   | 8                   | 0.74406 | 1.676 | 0.025    | 0.054068  |
| R-RNO-75892                            | Platelet Adhesion to exposed collagen                                 | 5    | 2                   | 0.9224  | 1.669 | <2.2e-16 | 0.054351  |
| R-RNO-9018519                          | Estrogen-dependent gene expression                                    | 36   | 13                  | 0.65068 | 1.646 | <2.2e-16 | 0.068589  |
| R-RNO-3322077                          | Glycogen synthesis                                                    | 5    | 1                   | 0.92485 | 1.617 | <2.2e-16 | 0.084922  |
| R-RNO-977606                           | Regulation of Complement cascade                                      | 11   | 3                   | 0.79669 | 1.613 | 0.026316 | 0.083793  |
| R-RNO-376176                           | Signaling by ROBO receptors                                           | 10   | 3                   | 0.80472 | 1.553 | <2.2e-16 | 0.15699   |
| R-RNO-1474228                          | Degradation of the extracellular matrix                               | 25   | 5                   | 0.6695  | 1.552 | <2.2e-16 | 0.15445   |
| R-RNO-75153                            | Apoptotic execution phase                                             | 26   | 13                  | 0.65895 | 1.552 | <2.2e-16 | 0.15132   |
| R-RNO-2470946                          | Cohesin Loading onto Chromatin                                        | 8    | 6                   | 0.81785 | 1.533 | 0.021277 | 0.17595   |
| R-RNO-4085377                          | SUMOylation of SUMOylation proteins                                   | 22   | 15                  | 0.67033 | 1.528 | 0.02381  | 0.17292   |
| R-RNO-774815                           | Nucleosome assembly                                                   | 9    | 2                   | 0.82107 | 1.519 | <2.2e-16 | 0.17001   |
| R-RNO-6803529                          | FGFR2 alternative splicing                                            | 15   | 6                   | 0.78999 | 1.516 | <2.2e-16 | 0.17      |
| R-RNO-74160                            | Gene expression (Transcription)                                       | 425  | 95                  | 0.43074 | 1.514 | <2.2e-16 | 0.16675   |
| R-RNO-9018678                          | Biosynthesis of specialized proresolving mediators (SPMs)             | 6    | 4                   | 0.83142 | 1.514 | 0.052632 | 0.16944   |
| R-RNO-3214858                          | RMTs methylate histone arginines                                      | 21   | 7                   | 0.69527 | 1.513 | <2.2e-16 | 0.16591   |
| R-RNO-5685939                          | HDR through MMEJ (alt-NHEJ)                                           | 5    | 2                   | 0.89126 | 1.507 | 0.021277 | 0.17359   |
| R-RNO-6811555                          | PI5P Regulates TP53 Acetylation                                       | 5    | 1                   | 0.88191 | 1.503 | 0.041667 | 0.17698   |
| R-RNO-199920                           | CREB phosphorylation                                                  | 5    | 2                   | 0.88164 | 1.502 | 0.021739 | 0.17454   |
| R-RNO-3928663                          | EPHA-mediated growth cone collapse                                    | 5    | 1                   | 0.86956 | 1.487 | <2.2e-16 | 0.19185   |
| R-RNO-191273                           | Cholesterol biosynthesis                                              | 12   | 4                   | 0.69019 | 1.468 | 0.027778 | 0.21348   |
| R-RNO-114508                           | Effects of PIP2 hydrolysis                                            | 12   | 5                   | 0.71675 | 1.46  | 0.054054 | 0.22501   |
| R-RNO-71064                            | Lysine catabolism                                                     | 6    | 2                   | 0.85237 | 1.451 | 0.044444 | 0.23871   |
| R-RNO-1663150                          | The activation of arylsulfatases                                      | 7    | 2                   | 0.83612 | 1.449 | 0.02381  | 0.23707   |
| R-RNO-73857                            | RNA Polymerase II Transcription                                       | 368  | 105                 | 0.42942 | 1.448 | <2.2e-16 | 0.23621   |
| R-RNO-76042                            | RNA Polymerase II Transcription Initiation And Promoter Clearance     | 29   | 4                   | 0.62904 | 1.425 | 0.054054 | 0.24848   |

| Gene Set      | Description                                                                                                                      | Size | Leading Edge Number | ES      | NES    | P Value  | FDR       |
|---------------|----------------------------------------------------------------------------------------------------------------------------------|------|---------------------|---------|--------|----------|-----------|
| R-RNO-983712  | Ion channel transport                                                                                                            | 56   | 26                  | -0.5956 | -1.534 | <2.2e-16 | 0.24026   |
| R-RNO-111931  | PKA-mediated phosphorylation of CREB                                                                                             | 9    | 3                   | -0.8504 | -1.539 | <2.2e-16 | 0.23059   |
| R-RNO-8876198 | RAB GEFs exchange GTP for GDP on RABs                                                                                            | 50   | 20                  | -0.6339 | -1.567 | <2.2e-16 | 0.15382   |
| R-RNO-2559582 | Senescence-Associated Secretory Phenotype (SASP)                                                                                 | 26   | 9                   | -0.6937 | -1.585 | 0.028986 | 0.12487   |
| R-RNO-1660661 | Sphingolipid de novo biosynthesis                                                                                                | 18   | 8                   | -0.7454 | -1.591 | <2.2e-16 | 0.12586   |
| R-RNO-9007101 | Rab regulation of trafficking                                                                                                    | 66   | 28                  | -0.6249 | -1.636 | <2.2e-16 | 0.057856  |
| R-RNO-74752   | Signaling by Insulin receptor                                                                                                    | 25   | 12                  | -0.7687 | -1.697 | <2.2e-16 | 0.026092  |
| R-RNO-163200  | Mitochondrial respiratory electron transport, ATP synthesis by chemiosmotic coupling, and heat production by uncoupling proteins | 56   | 17                  | -0.6567 | -1.701 | <2.2e-16 | 0.02712   |
| R-RNO-927802  | Nonsense-Mediated Decay (NMD)                                                                                                    | 41   | 18                  | -0.7165 | -1.706 | <2.2e-16 | 0.021214  |
| R-RNO-975957  | Nonsense Mediated Decay (NMD) enhanced by the Exon Junction Complex (EJC)                                                        | 41   | 18                  | -0.7165 | -1.706 | <2.2e-16 | 0.021214  |
| R-RNO-72689   | Formation of a pool of free 40S subunits                                                                                         | 22   | 18                  | -0.8108 | -1.711 | <2.2e-16 | 0.022252  |
| R-RNO-156827  | L13a-mediated translational silencing of Ceruloplasmin expression                                                                | 29   | 20                  | -0.7563 | -1.715 | <2.2e-16 | 0.0225    |
| R-RNO-72649   | Translation initiation complex formation                                                                                         | 29   | 20                  | -0.7563 | -1.715 | <2.2e-16 | 0.0225    |
| R-RNO-72662   | Activation of the mRNA upon binding of the cap-binding complex and eIFs, and subsequent binding to 43S                           | 29   | 20                  | -0.7563 | -1.715 | <2.2e-16 | 0.0225    |
| R-RNO-72702   | Ribosomal scanning and start codon recognition                                                                                   | 29   | 20                  | -0.7563 | -1.715 | <2.2e-16 | 0.0225    |
| R-RNO-72706   | GTP hydrolysis and joining of the 60S ribosomal subunit                                                                          | 29   | 20                  | -0.7563 | -1.715 | <2.2e-16 | 0.0225    |
| R-RNO-72613   | Eukaryotic Translation Initiation                                                                                                | 32   | 23                  | -0.7643 | -1.722 | <2.2e-16 | 0.031683  |
| R-RNO-72737   | Cap-dependent Translation Initiation                                                                                             | 32   | 23                  | -0.7643 | -1.722 | <2.2e-16 | 0.031683  |
| R-RNO-72695   | Formation of the ternary complex, and subsequently, the 43S complex                                                              | 25   | 19                  | -0.8048 | -1.742 | <2.2e-16 | 0.021214  |
| R-RNO-5389840 | Mitochondrial translation elongation                                                                                             | 68   | 36                  | -0.7178 | -1.862 | <2.2e-16 | 0.0024107 |
| R-RNO-5368287 | Mitochondrial translation                                                                                                        | 71   | 36                  | -0.7134 | -1.883 | <2.2e-16 | <2.2e-16  |
| R-RNO-5419276 | Mitochondrial translation termination                                                                                            | 70   | 35                  | -0.7103 | -1.887 | <2.2e-16 | <2.2e-16  |
| R-RNO-72766   | Translation                                                                                                                      | 109  | 62                  | -0.7323 | -2.034 | <2.2e-16 | <2.2e-16  |

**S8:** GSEA analysis against reactome pathways looking for deregulated biological processes in the HI+Hypothermia group compared to the HI untreated group.

**Table**

|                                               | UP                                       |      |                     |        |       |          |        |
|-----------------------------------------------|------------------------------------------|------|---------------------|--------|-------|----------|--------|
|                                               | DOWN                                     |      |                     |        |       |          |        |
| GSEA ANALYSIS AGAINST REACTOME PATHWAY        |                                          |      |                     |        |       |          |        |
| No reactome pathway downregulated at FDR<0.25 |                                          |      |                     |        |       |          |        |
| Gene Set                                      | Description                              | Size | Leading Edge Number | ES     | NES   | P Value  | FDR    |
| R-RNO-5675482                                 | Regulation of necroptotic cell death     | 7    | 2                   | 0,9622 | 1,76  | <2.2e-16 | 0,1854 |
| R-RNO-5357956                                 | TNFR1-induced NFkappaB signaling pathway | 16   | 2                   | 0,8139 | 1,759 | <2.2e-16 | 0,1048 |
| R-RNO-75893                                   | TNF signaling                            | 25   | 6                   | 0,7413 | 1,739 | 0,02941  | 0,0994 |
| R-RNO-5357905                                 | Regulation of TNFR1 signaling            | 19   | 3                   | 0,7932 | 1,68  | <2.2e-16 | 0,2015 |

**Table S9:** GSEA analysis against reactome pathways looking for deregulated biological processes in the HI+Sildenafil group compared to the HI untreated group.

No reactome pathway up or downregulated at FDR<0.25

**Table S10:** GSEA analysis against reactome pathways looking for deregulated biological processes in the HI+Hypothermia+Sildenafil group compared to the HI untreated group.

|                                               | UP                                                            |      |                     |        |       |          |         |
|-----------------------------------------------|---------------------------------------------------------------|------|---------------------|--------|-------|----------|---------|
|                                               | DOWN                                                          |      |                     |        |       |          |         |
| No reactome pathway downregulated at FDR<0.25 |                                                               |      |                     |        |       |          |         |
| Gene Set                                      | Description                                                   | Size | Leading Edge Number | ES     | NES   | P Value  | FDR     |
| R-RNO-389356                                  | CD28 co-stimulation                                           | 20   | 6                   | 0,8661 | 1,848 | <2.2e-16 | 0,03729 |
| R-RNO-450385                                  | Butyrate Response Factor 1 (BRF1) binds and destabilizes mRNA | 12   | 2                   | 0,8727 | 1,723 | <2.2e-16 | 0,14917 |
| R-RNO-5218920                                 | VEGFR2 mediated vascular permeability                         | 20   | 3                   | 0,8095 | 1,638 | <2.2e-16 | 0,18168 |
| R-RNO-2871796                                 | FCERI mediated MAPK activation                                | 19   | 3                   | 0,8122 | 1,632 | <2.2e-16 | 0,18291 |
| R-RNO-5621575                                 | CD209 (DC-SIGN) signaling                                     | 15   | 3                   | 0,8772 | 1,735 | <2.2e-16 | 0,18646 |
| R-RNO-399954                                  | Sema3A PAK dependent Axon repulsion                           | 10   | 2                   | 0,9239 | 1,672 | <2.2e-16 | 0,19268 |
| R-RNO-2682334                                 | EPH-Ephrin signaling                                          | 37   | 9                   | 0,6902 | 1,638 | <2.2e-16 | 0,19371 |
| R-RNO-450604                                  | KSRP (KHSRP) binds and destabilizes mRNA                      | 9    | 2                   | 0,892  | 1,643 | <2.2e-16 | 0,19437 |
| R-RNO-416993                                  | Trafficking of GluR2-containing AMPA receptors                | 8    | 4                   | 0,8508 | 1,618 | 0,02041  | 0,19656 |
| R-RNO-199992                                  | trans-Golgi Network Vesicle Budding                           | 46   | 11                  | 0,6524 | 1,593 | <2.2e-16 | 0,19837 |
| R-RNO-421837                                  | Clathrin derived vesicle budding                              | 46   | 11                  | 0,6524 | 1,593 | <2.2e-16 | 0,19837 |
| R-RNO-6791226                                 | Major pathway of rRNA processing in the nucleolus and cytosol | 80   | 11                  | 0,5759 | 1,599 | <2.2e-16 | 0,19889 |
| R-RNO-72312                                   | rRNA processing                                               | 80   | 11                  | 0,5759 | 1,599 | <2.2e-16 | 0,19889 |
| R-RNO-8868773                                 | rRNA processing in the nucleus and cytosol                    | 80   | 11                  | 0,5759 | 1,599 | <2.2e-16 | 0,19889 |

|               |                                                                                  |    |    |        |       |          |         |
|---------------|----------------------------------------------------------------------------------|----|----|--------|-------|----------|---------|
| R-RNO-5626467 | RHO GTPases activate IQGAPs                                                      | 19 | 5  | 0,7638 | 1,621 | 0,03636  | 0,20221 |
| R-RNO-432722  | Golgi Associated Vesicle Biogenesis                                              | 35 | 10 | 0,6894 | 1,683 | 0,02439  | 0,20386 |
| R-RNO-190840  | Microtubule-dependent trafficking of connexons from Golgi to the plasma membrane | 10 | 4  | 0,8135 | 1,579 | 0,01695  | 0,20599 |
| R-RNO-190861  | Gap junction assembly                                                            | 10 | 4  | 0,8135 | 1,579 | 0,01695  | 0,20599 |
| R-RNO-190872  | Transport of connexons to the plasma membrane                                    | 10 | 4  | 0,8135 | 1,579 | 0,01695  | 0,20599 |
| R-RNO-194138  | Signaling by VEGF                                                                | 55 | 8  | 0,647  | 1,654 | 0,01923  | 0,20666 |
| R-RNO-5632684 | Hedgehog 'on' state                                                              | 51 | 12 | 0,651  | 1,645 | <2.2e-16 | 0,21008 |
| R-RNO-8856825 | Cargo recognition for clathrin-mediated endocytosis                              | 49 | 17 | 0,6595 | 1,658 | <2.2e-16 | 0,2131  |
| R-RNO-4420097 | VEGFA-VEGFR2 Pathway                                                             | 54 | 8  | 0,6477 | 1,689 | 0,01887  | 0,21443 |
| R-RNO-5099900 | WNT5A-dependent internalization of FZD4                                          | 11 | 5  | 0,809  | 1,607 | 0,03846  | 0,21616 |
| R-RNO-1433559 | Regulation of KIT signaling                                                      | 7  | 5  | 0,8387 | 1,583 | <2.2e-16 | 0,21828 |
| R-RNO-5696394 | DNA Damage Recognition in GG-NER                                                 | 24 | 10 | 0,7592 | 1,646 | 0,02128  | 0,21961 |
| R-RNO-2029480 | Fcgamma receptor (FCGR) dependent phagocytosis                                   | 48 | 13 | 0,6309 | 1,601 | <2.2e-16 | 0,22375 |
| R-RNO-5358351 | Signaling by Hedgehog                                                            | 71 | 15 | 0,607  | 1,607 | <2.2e-16 | 0,22668 |
| R-RNO-389357  | CD28 dependent PI3K/Akt signaling                                                | 13 | 3  | 0,8291 | 1,569 | <2.2e-16 | 0,22675 |
| R-RNO-5627123 | RHO GTPases activate PAKs                                                        | 16 | 3  | 0,7804 | 1,559 | 0,02128  | 0,24986 |
